# Supplementary material for: Assessment of Sediment Quality and Vulnerability of Tropical Marine Species in the Society Islands, French Polynesia
Source: Research Square preprint supplement (doi:10.21203/rs.3.rs-6711214/v1), 2025-06-05
Supplement: Supplementary file 1 [file d12e9424deb2e62b7413b914.docx]

# SUPPLEMENTARY MATERIALS (SM)

**SM1:** Geographical coordinates of sediment sampling stations in the Society Islands. The sites were categorized as "Aquaculture", "Reef zone", "Tourist area", "Harbor", river mouths, and other", based on the predominant surrounding activity. (PPT) : Papeete

| **Sites** | **Zone** | **Id** | **Categories** | **Date** | **Longitude** | **Latitude** | **Depth (m)** |
| --- | --- | --- | --- | --- | --- | --- | --- |
| TAHITI | Teva i uta | T1 | River mouth | 10/01/2024 | -149,46799 | -17,778192 | <3 |
| TAHITI | Teva i uta | T2 | River mouth | 10/01/2024 | -149,452553 | -17,780244 | <3 |
| TAHITI | Teva i uta | T3 | Harbor | 10/01/2024 | -149,43498 | -17,77138 | <3 |
| TAHITI | Teva i uta | T4 | River mouth | 10/01/2024 | -149,40468 | -17,7696 | <3 |
| TAHITI | Teva i uta | T5 | Others | 10/01/2024 | -149,39799 | -17,77157 | <3 |
| TAHITI | Teva i uta | T6 | River mouth | 10/01/2024 | -149,3949 | -17,77031 | <3 |
| TAHITI | Teva i uta | T7 | Aquaculture | 10/01/2024 | -149,38934 | -17,76664 | <3 |
| TAHITI | Teva i uta | T8 | River mouth | 10/01/2024 | -149,35489 | -17,75905 | <3 |
| TAHITI | Teva i uta | T9 | River mouth | 10/01/2024 | -149,349 | -17,7572 | <3 |
| TAHITI | Tairapu W | T10 | Others | 10/01/2024 | -149,33499 | -17,73508 | <3 |
| TAHITI | Tairapu W | T11 | Harbor | 10/01/2024 | -149,33157 | -17,73062 | <3 |
| TAHITI | Tairapu W | T12 | River mouth | 10/01/2024 | -149,3278 | -17,73137 | <3 |
| TAHITI | Tairapu W | T13 | Others | 10/01/2024 | -149,32202 | -17,7306 | <3 |
| TAHITI | Tairapu W | T14 | Others | 10/01/2024 | -149,33466 | -17,74175 | 18 |
| TAHITI | Tairapu W | T15 | Others | 10/01/2024 | -149,3306 | -17,7446 | <3 |
| TAHITI | Tairapu W | T16 | Aquaculture | 10/01/2024 | -149,33199 | -17,7562 | 16 |
| TAHITI | Tairapu W | T17 | River mouth | 10/01/2024 | -149,31798 | -17,76326 | <3 |
| TAHITI | Tairapu W | T18 | Harbor | 10/01/2024 | -149,30957 | -17,78024 | <3 |
| TAHITI | Tairapu W | T19 | Aquaculture | 10/01/2024 | -149,30429 | -17,80571 | 5 |
| TAHITI | Tairapu W | T20 | Touristic zone | 12/01/2024 | -149,305068 | -17,783532 | <3 |
| TAHITI | Tairapu W | T21 | Harbor | 10/01/2024 | -149,29613 | -17,80314 | <3 |
| TAHITI | Tairapu W | T22 | River mouth | 11/01/2024 | -149,2971 | -17,82023 | <3 |
| TAHITI | Tairapu W | T23 | Aquaculture | 11/01/2024 | -149,29091 | -17,82736 | <3 |
| TAHITI | Tairapu W | T24 | Harbor | 11/01/2024 | -149,26239 | -17,85039 | 3,1 |
| TAHITI | Tairapu W | T25 | River mouth | 11/01/2024 | -149,25874 | -17,8552 | <3 |
| TAHITI | Tairapu W | T26 | River mouth | 12/01/2024 | -149,25325 | -17,85716 | <3 |
| TAHITI | Tairapu W | T27 | River mouth | 12/01/2024 | -149,25134 | -17,85828 | <3 |
| TAHITI | Tairapu W | T28 | Reef zone | 11/01/2024 | -149,20158 | -17,87771 | 3,7 |
| TAHITI | Faaa - Paea | T29 | Harbor | 15/01/2024 | -149,578386 | -17,7361 | <3 |
| TAHITI | Faaa - Paea | T30 | Touristic zone | 15/01/2024 | -149,614982 | -17,610184 | <3 |
| TAHITI | Faaa - Paea | T31 | River mouth | 15/01/2024 | -149,614447 | -17,603058 | <3 |
| TAHITI | Faaa - Paea | T32 | Harbor | 15/01/2024 | -149,61488 | -17,58675 | <3 |
| TAHITI | Faaa - Paea | T33 | Harbor | 15/01/2024 | -149,61647 | -17,58472 | <3 |
| TAHITI | Faaa - Paea | T34 | Touristic zone | 15/01/2024 | -149,61685 | -17,57603 | <3 |
| TAHITI | Faaa - Paea | T35 | Others | 15/01/2024 | -149,61638 | -17,56939 | <3 |
| TAHITI | Faaa - Paea | T36 | River mouth | 15/01/2024 | -149,62842 | -17,56558 | <3 |
| TAHITI | Faaa - Paea | T37 | Reef zone | 15/01/2024 | -149,61505 | -17,55585 | <3 |
| **Sites** | **Zone** | **Id** | **Categories** | **Date** | **Longitude** | **Latitude** | **Depth (m)** |
| TAHITI | Faaa - Paea | T38 | River mouth | 15/01/2024 | -149,592533 | -17,545097 | <3 |
| TAHITI | Faaa - Paea | T39 | River mouth | 15/01/2024 | -149,300821 | -17,605201 | <3 |
| TAHITI | Faaa - Paea | T40 | Others | 15/01/2024 | -149,322241 | -17,567165 | <3 |
| TAHITI | Faaa - Paea | T41 | River mouth | 15/01/2024 | -149,32538 | -17,56327 | <3 |
| TAHITI | Faaa - Paea | T42 | River mouth | 15/01/2024 | -149,41794 | -17,51313 | <3 |
| TAHITI | Faaa - Paea | T43 | River mouth | 15/01/2024 | -149,48402 | -17,499442 | <3 |
| TAHITI | Faaa - Paea | T44 | Touristic zone | 15/01/2024 | -149,495149 | -17,495221 | <3 |
| TAHITI | PPT-Mahina | T45 | Others | 16/01/2024 | -149,500513 | -17,509924 | <3 |
| TAHITI | PPT Mahina | T46 | Touristic zone | 16/01/2024 | -149,50668 | -17,51574 | <3 |
| TAHITI | PPT Mahina | T47 | River mouth | 16/01/2024 | -149,5536 | -17,52383 | <3 |
| TAHITI | PPT Mahina | T48 | Harbor | 16/01/2024 | -149,56647 | -17,52826 | 5 |
| TAHITI | PPT Mahina | T49 | Harbor | 16/01/2024 | -149,568809 | -17,528016 | <3 |
| TAHITI | PPT Mahina | T50 | Harbor | 16/01/2024 | -149,570874 | -17,529952 | <3 |
| TAHITI | PPT Mahina | T51 | Harbor | 16/01/2024 | -149,57814 | -17,53219 | 23 |
| TAHITI | PPT Mahina | T52 | Harbor | 16/01/2024 | -149,57416 | -17,53325 | 20 |
| TAHITI | PPT Mahina | T53 | Harbor | 16/01/2024 | -149,56949 | -17,53429 | 4 |
| TAHITI | PPT Mahina | T54 | Harbor | 16/01/2024 | -149,56935 | -17,53584 | 11 |
| TAHITI | PPT Mahina | T55 | Harbor | 16/01/2024 | -149,569102 | -17,539309 | 8 |
| TAHITI | PPT Mahina | T56 | Harbor | 16/01/2024 | -149,57951 | -17,5363 | 15 |
| TAHITI | PPT Mahina | T57 | Harbor | 16/01/2024 | -149,57939 | -17,53326 | 22 |
| TAHITI | PPT Mahina | T58 | River mouth | 16/01/2024 | -149,58009 | -17,54301 | 7 |
| TAHITI | PPT Mahina | T59 | River mouth | 16/01/2024 | -149,55069 | -17,52485 | <3 |
| TAHITI | PPT Mahina | T60 | Harbor | 16/01/2024 | -149,534319 | -17,524768 | <3 |
| TAHITI | PPT Mahina | T61 | Harbor | 16/01/2024 | -149,52777 | -17,52205 | <3 |
| TAHITI | Faaa - Paea | T62 | River mouth | 16/01/2024 | -149,57969 | -17,732616 | <3 |
| TAHITI | Faaa - Paea | T63 | River mouth | 16/01/2024 | -149,585798 | -17,690398 | <3 |
| TAHITI | Faaa - Paea | T64 | Touristic zone | 16/01/2024 | -149,59833 | -17,659755 | <3 |
| TAHITI | Faaa - Paea | T65 | Touristic zone | 16/01/2024 | -149,609765 | -17,640634 | <3 |
| TAHITI | Faaa - Paea | T66 | River mouth | 16/01/2024 | -149,613569 | -17,628579 | <3 |
| MOOREA | Moorea | T67 | Touristic zone | 17/01/2024 | -149,759571 | -17,49843 | <3 |
| MOOREA | Moorea | T68 | Harbor | 17/01/2024 | -149,7785 | -17,52047 | 6 |
| MOOREA | Moorea | T70 | Harbor | 17/01/2024 | -149,777252 | -17,523897 | <3 |
| MOOREA | Moorea | T71 | River mouth | 17/01/2024 | -149,78915 | -17,55093 | <3 |
| MOOREA | Moorea | T72 | River mouth | 17/01/2024 | -149,80559 | -17,58685 | 6 |
| MOOREA | Moorea | T73 | Others | 17/01/2024 | -149,84337 | -17,58365 | <3 |
| MOOREA | Moorea | T74 | River mouth | 17/01/2024 | -149,85385 | -17,58007 | <3 |
| MOOREA | Moorea | T75 | River mouth | 17/01/2024 | -149,87091 | -17,565491 | 8 |
| MOOREA | Moorea | T76 | River mouth | 17/01/2024 | -149,9055 | -17,5354 | <3 |
| MOOREA | Moorea | T77 | Touristic zone | 17/01/2024 | -149,90907 | -17,48761 | <3 |
| MOOREA | Moorea | T78 | Touristic zone | 17/01/2024 | -149,90376 | -17,48944 | <3 |
| MOOREA | Moorea | T79 | Others | 17/01/2024 | -149,85075 | -17,51472 | <3 |
| MOOREA | Moorea | T80 | Touristic zone | 17/01/2024 | -149,84265 | -17,4822 | <3 |
| MOOREA | Moorea | T81 | River mouth | 17/01/2024 | -149,82164 | -17,50535 | <3 |
| MOOREA | Moorea | T82 | Harbor | 17/01/2024 | -149,871701 | -17,491847 | <3 |
| TAHITI | East coast | T83 | Others | 18/01/2024 | -149,513225 | -17,762214 | <3 |
| TAHITI | East coast | T84 | River mouth | 18/01/2024 | -149,50185 | -17,7641 | <3 |
| TAHITI | East coast | T85 | River mouth | 18/01/2024 | -149,16582 | -17,75259 | <3 |
| **Sites** | **Zone** | **Id** | **Categories** | **Date** | **Longitude** | **Latitude** | **Depth (m)** |
| TAHITI | East coast | T86 | Harbor | 18/01/2024 | -149,22856 | -17,73563 | <3 |
| TAHITI | East coast | TF1 | Others | 18/01/2024 | -149,3035 | -17,69799 | <3 |
| TAHITI | East coast | TF2 | Others | 18/01/2024 | -149,30515 | -17,71603 | 12 |
| TAHITI | East coast | TF3 | Others | 18/01/2024 | -149,30258 | -17,71443 | 14 |
| TAHITI | East coast | TF4 | Others | 18/01/2024 | -149,30012 | -17,72457 | 15 |
| TAHITI | East coast | TF5 | Others | 18/01/2024 | -149,29722 | -17,72712 | 18 |
| TAHITI | East coast | TF6 | Others | 18/01/2024 | -149,28944 | -17,72863 | 11 |
| TAHITI | East coast | TF7 | Others | 18/01/2024 | -149,29343 | -17,72329 | 30 |
| TAHITI | East coast | TF8 | Others | 18/01/2024 | -149,300195 | -17,715671 | 28 |
| TAHITI | East coast | TF9 | Others | 18/01/2024 | -149,2951 | -17,71523 | 40 |
| TAHITI | East coast | TF10 | Harbor | 18/01/2024 | -149,30583 | -17,719413 | <3 |
| HUAHINE |  | H1 | Others | 22/01/2024 | -151,00943 | -16,767445 | <3 |
| HUAHINE |  | H2 | River mouth | 22/01/2024 | -150,99069 | -16,73126 | <3 |
| HUAHINE |  | H3 | River mouth | 22/01/2024 | -150,98439 | -16,71449 | <3 |
| HUAHINE |  | H4 | Others | 22/01/2024 | -150,95114 | -16,77184 | <3 |
| HUAHINE |  | H5 | Others | 22/01/2024 | -150,96777 | -16,7947 | <3 |
| HUAHINE |  | H6 | River mouth | 22/01/2024 | -150,98215 | -16,80973 | <3 |
| HUAHINE |  | H7 | Others | 22/01/2024 | -151,0096 | -16,78209 | <3 |
| HUAHINE |  | H8 | Reef zone | 22/01/2024 | -151,039 | -16,78243 | <3 |
| HUAHINE |  | H9 | River mouth | 22/01/2024 | -151,0334 | -16,73715 | <3 |
| HUAHINE |  | H10 | Touristic zone | 22/01/2024 | -151,03897 | -16,71153 | <3 |
| HUAHINE |  | H11 | Harbor | 22/01/2024 | -151,035355 | -16,714359 | <3 |
| HUAHINE |  | H12 | Harbor | 22/01/2024 | -151,032509 | -16,72147 | <3 |
| HUAHINE |  | H13 | Others | 22/01/2024 | -151,013962 | -16,690868 | <3 |
| BORA BORA |  | B1 | Others | 23/01/2024 | -151,75181 | -16,501495 | <3 |
| BORA BORA |  | B2 | Others | 23/01/2024 | -151,759807 | -16,492954 | <3 |
| BORABORA |  | B4 | Harbor | 23/01/2024 | -151,752306 | -16,506782 | <3 |
| BORA BORA |  | B5 | Harbor | 23/01/2024 | -151,743969 | -16,487343 | <3 |
| BORA BORA |  | B6 | Others | 23/01/2024 | -151,755919 | -16,478054 | <3 |
| BORA BORA |  | B7 | Others | 23/01/2024 | -151,719701 | -16,487243 | <3 |
| BORA BORA |  | B8 | River mouth | 23/01/2024 | -151,7213 | -16,50551 | <3 |
| BORA BORA |  | B9 | Touristic zone | 23/01/2024 | -151,736719 | -16,542286 | <3 |
| BORA BORA |  | B10 | Harbor | 24/01/2024 | -151,75848 | -16,48646 | 20 |
| BORA BORA |  | B11 | Harbor | 24/01/2024 | -151,754475 | -16,446756 | <3 |
| BORA BORA |  | B12 | Reef zone | 24/01/2024 | -151,71637 | -16,46611 | <3 |
| BORA BORA |  | B13 | Touristic zone | 24/01/2024 | -151,69885 | -16,48739 | <3 |
| BORA BORA |  | B14 | Touristic zone | 24/01/2024 | -151,70238 | -16,49514 | <3 |
| BORA BORA |  | B15 | Touristic zone | 24/01/2024 | -151,70266 | -16,49888 | <3 |
| BORA BORA |  | B16 | Harbor | 24/01/2024 | -151,71661 | -16,48849 | <3 |
| BORA BORA |  | B17 | Touristic zone | 24/01/2024 | -151,77119 | -16,52702 | <3 |
| RAIATEA |  | R1 | Harbor | 25/01/2024 | -151,44252 | -16,72969 | <3 |
| RAIATEA |  | R2 | Others | 25/01/2024 | -151,4505 | -16,72319 | <3 |
| RAIATEA |  | R3 | Harbor | 25/01/2024 | -151,4476 | -16,7252 | <3 |
| RAIATEA |  | R4 | Harbor | 25/01/2024 | -151,44673 | -16,72496 | <3 |
| RAIATEA |  | R5 | Harbor | 25/01/2024 | -151,439112 | -16,733385 | 25 |
| RAIATEA |  | R6 | Harbor | 25/01/2024 | -151,48489 | -16,7359 | 5 |
| RAIATEA |  | R7 | Harbor | 25/01/2024 | -151,484187 | -16,735938 | <3 |
| **Sites** | **Zone** | **Id** | **Categories** | **Date** | **Longitude** | **Latitude** | **Depth (m)** |
| RAIATEA |  | R8 | Harbor | 25/01/2024 | -151,47771 | -16,72787 | 5 |
| RAIATEA |  | R9 | Others | 25/01/2024 | -151,47296 | -16,72425 | <3 |
| RAIATEA |  | R10 | River mouth | 25/01/2024 | -151,43665 | -16,74516 | <3 |
| RAIATEA |  | R11 | Harbor | 25/01/2024 | -151,42398 | -16,77548 | <3 |
| RAIATEA |  | R12 | River mouth | 25/01/2024 | -151,4173 | -16,81911 | <3 |
| RAIATEA |  | R13 | River mouth | 25/01/2024 | -151,3732 | -16,83333 | <3 |
| RAIATEA |  | R14 | River mouth | 25/01/2024 | -151,43198 | -16,89549 | <3 |
| RAIATEA |  | R15 | Reef zone | 25/01/2024 | -151,431561 | -16,918956 | <3 |
| RAIATEA |  | R16 | River mouth | 26/01/2024 | -151,481227 | -16,84276 | <3 |
| RAIATEA |  | R17 | Others | 26/01/2024 | -151,492834 | -16,792187 | <3 |
| TAHA'A |  | T.1 | Harbor | 26/01/2024 | -151,484884 | -16,683724 | <3 |
| TAHA'A |  | T.2 | Harbor | 26/01/2024 | -151,45911 | -16,67882 | <3 |
| TAHA'A |  | T.3 | River mouth | 26/01/2024 | -151,49101 | -16,6373 | <3 |
| TAHA'A |  | T.4 | River mouth | 26/01/2024 | -151,4586 | -16,62595 | <3 |
| TAHA'A |  | T.5 | Reef zone | 26/01/2024 | -151,46123 | -16,56937 | <3 |
| TAHA'A |  | T.6 | Harbor | 26/01/2024 | -151,497399 | -16,582549 | <3 |
| TAHA'A |  | T.7 | Others | 26/01/2024 | -151,531721 | -16,587907 | <3 |
| TAHA'A |  | T.8 | Harbor | 26/01/2024 | -151,54642 | -16,61866 | <3 |
| TAHA'A |  | T.9 | Others | 26/01/2024 | -151,513354 | -16,64212 | <3 |

**SM2**: Summary of spawning data for the species used in the tests.

| **Species** | **Source** | **Date of spawning** | **Spawning induction** | **Number of males** | **Number of females** |
| --- | --- | --- | --- | --- | --- |
| ***Saccostrea cucculata*** | Ifremer, Vairao | 19/02/2024 | Scarification | 6 | 4 |
|
| ***Tripneustes gratilia*** | Tahiti Lagoon | 28/02/2024 | Mechanical shock | 1 | 1 |
|
| ***Holothuria fuscogilva*** | Tahiti Marine Product | 08/03/2024 | Thermal shock | 1 | 1 |
|
| ***Litopenaeus stylirostris*** | VAIA (Industrial production)( | 10/04/2024 | Artifical fecondation | NA | NA |
|
|

**SM3**: Range of CuSO4 concentrations tested by species, in addition to negative controls (no CuS04)

| **CuSO4 concentration (µg/L)** | 10 | 20 | 40 | 80 | 160 | 500 | 1000 |
| --- | --- | --- | --- | --- | --- | --- | --- |
| ***Saccostrea cucullata*** | X | X | X | X | X | X | X |
| ***Tripneustes gratilla*** |  | X | X | X | X | X | X |
| ***Holothuria fuscogilva*** |  | X | X | X | X | X | X |
| ***Litopenaeus stylirostris*** | X |  |  | X | X | X | X |

**SM4**: Ecotoxological parameters (adjustment models, EC50, confidence interval and range of values) measured for control using CuSO4 as a reference material, and the species *S. cucculata*, *T. gratilia*, *H. fuscogilva*, and *L. stylirostris*.

| **Species** | **Model** | **EC50 (µg/L)** | **95% CI ±** | **CI Lower (µg/L)** | **CI Upper (µg/L)** | **CI Width (%)** |
| --- | --- | --- | --- | --- | --- | --- |
| *S.cucculata* | Constrained Logistic | 57.49 | 12.32 | 51.53 | 64.13 | 21.93 |
| *S.cucculata* | Probit | 57.22 | 12.65 | 52.24 | 62.67 | 18.24 |
| *S.cucculata* | W1.4 | 60.12 | 27.34 | 58.89 | 61.33 | 3.79 |
|  |  |  |  |  |  |  |
| *T.gratilia* | Constrained Logistic | 53.44 | 15.48 | 41.97 | 68.04 | 48.80 |
| *T.gratilia* | Probit | 55.49 | 13.94 | 50.60 | 60.86 | 18.50 |
| *T.gratilia* | W1.4 | 53.62 | 47.08 | 52.52 | 54.72 | 3.64 |
|  |  |  |  |  |  |  |
| *H.fuscogilva* | Constrained Logistic | 60.48 | 16.77 | 50.53 | 72.40 | 36.15 |
| *H.fuscogilva* | Probit | 62.61 | 17.12 | 55.90 | 70.13 | 22.72 |
| *H.fuscogilva* | W1.4 | 62.13 | 28.92 | 60.90 | 63.57 | 5.26 |
|  |  |  |  |  |  |  |
| *L.stylirostris* | Constrained Logistic | 108.40 | 4.49 | 85.44 | 137.54 | 48.06 |
| *L.stylirostris* | Probit | 105.52 | 97.06 | 100.70 | 110.59 | 9.37 |
| *L.stylirostris* | W1.4 | 107.58 | 105.52 | 104.84 | 110.28 | 9.01 |

*EC50: Concentration affecting 50% of larvae

**SM5**: Larval development of the two species *Tripneustes gratilla* larvae (A), and L*itopenaeus stylirostris* (B).in increasing concentrations of sediment elutriates extracted from different sites. Sites were representative from a reference area (site TF5), harbors (sites T53 and T55), reef areas (sites T36 and T77), and a polluted bay (site T10). The test was performed to confirm that changes in the percentage of anomalies during larval development was a consequyence ofd sediment pollution ( positive control)

A
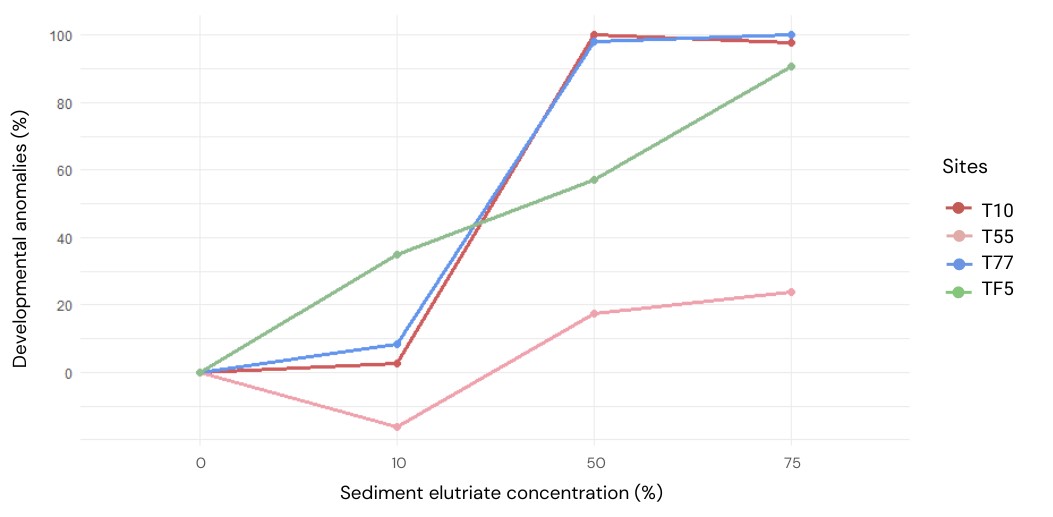
B
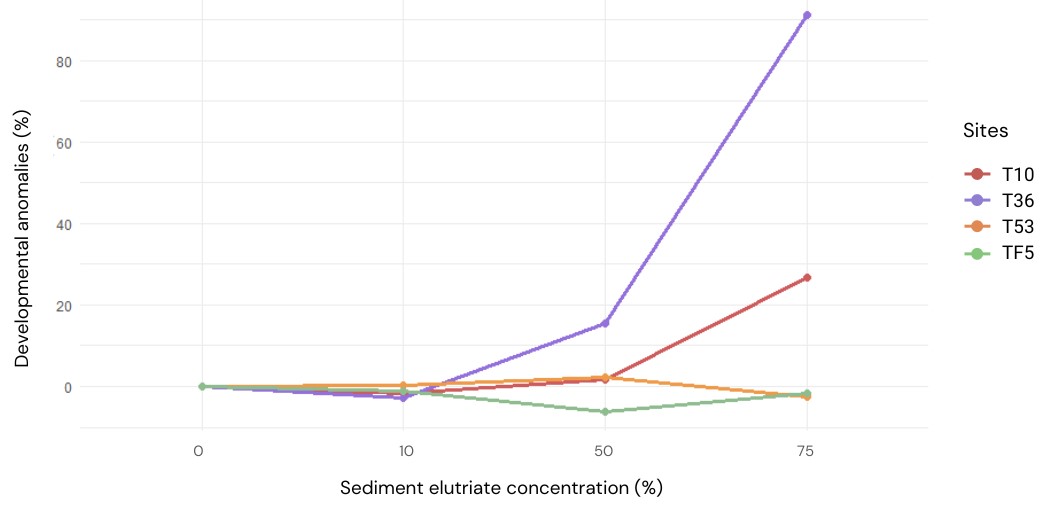


**SM 6**: Toxicity of sediments in four tropical species, as measured by the percentage of abnormal larvae of *Saccostrea cucculata, Tripneusted gracilaria, Holothuria Fuscogilva, and Litopeaneus stylirostris,* Results for S Cucculata are indicative and were not used for comparisons. ( ) Standard error. Negative percentages indicate less less abnormal larvae in sample compared to controls.

| **Island** | **Site** | **Longitude** | **Latitude** | ***S. Cucculata*** | ***T. Gracilaria*** | ***H. Fuscogilva*** | ***L. Stylirostris*** |
| --- | --- | --- | --- | --- | --- | --- | --- |
| TAHITI | T1 | -149,46799 | -17,77819 | 2,5 (9,5) | 46,1 (8,9) | 100 |  |
| TAHITI | T2  (Atimaono) | -149,45255 | -17,78024 | 2,1 (13),5 | 38,7 (14,5) | 100 | 58,8 (7,8 |
| TAHITI | T3 (Teva i Uta harbor) | -149,43498 | -17,77138 | -19 (9,4) | 27 (10,8) | 5 (24,6) |  |
| TAHITI | T4 | -149,40468 | -17,7696 | -16,6 (4,1) | 20,2 (2,1) | 74,8 (43,7) |  |
| TAHITI | T5 | -149,39799 | -17,77157 | -11,7 (9,5) | 7,3 (5,2) | 100 |  |
| TAHITI | T6 | -149,3949 | -17,77031 | -11 (13) | 78,6 (5,44) | 100 |  |
| TAHITI | T7 | -149,38934 | -17,76664 | -17,5 (4,5) | 20.2 (5,43) | 91 (8,68) |  |
| TAHITI | T8 (Titaaviri) | -149,35489 | -17,75905 | 91,8 (3,5) | 69,8 (1,3) | 89,3 (6,34) | 19.8 (1,2) |
| TAHITI | T9 | -149,349 | -17,7572 | 36.8 (14) | 66 (0,1) | 37.4 (28,2) | 17,2 (8,3) |
| TAHITI | T10 | -149,33499 | -17,73508 | 98.4 (2,4) | 73.3 (0,7) | 59.1 (27) | 0 (9,13) |
| TAHITI | T11 | -149,33157 | -17,73062 | -19,2 (5,9) | 25.2 (3,3) | 100 | -1,75 |
| TAHITI | T12 | -149,3278 | -17,73137 | 4.5 (6,9) | 23.8 (0,5) | 8.1 (2,5) | -2 |
| TAHITI | T13 | -149,32202 | -17,7306 | 7.1 (4,3) | 80.4 (10,1) | 14.7 | 16,9 (3,2) |
| TAHITI | T14 | -149,33466 | -17,74175 | -15,5 (7,6) | 64.2 (5,5) | 1.7 (10) | 12,1 (9,23) |
| TAHITI | T15 | -149,3306 | -17,7446 | 99.1 (0,8) | 44.3 (6,6) | 100 | 35,2 (18,4) |
| TAHITI | T16 | -149,33199 | -17,7562 | -8,8 (10,1) | 48.7 (7,8) | 100 | 10,6 (3,16 |
| TAHITI | T17 (Aoma river) | -149,31798 | -17,76326 | 26.9 (7,5) | 309,5 (6,1) | 65.9 (47) | 32 (33) |
| TAHITI | T18 | -149,30957 | -17,78024 | -7,2 (3) | 21.8 (11,2) | 50,5 (35) |  |
| TAHITI | T19 | -149,30429 | -17,80571 | -23 (7,9) | 40.4 (8,4) | 12.4 (11,7) | 8,6 (5,8) |
| TAHITI | T20 | -149,30507 | -17,78353 | -4,5 (11,5) | 9.4 (5,4) |  |  |
| TAHITI | T21 | -149,29613 | -17,80314 | Non valid | | | |
| TAHITI | T22 | -149,2971 | -17,82023 | -6,8 (9,5) | 28.8 (26,5) |  |  |
| TAHITI | T23 | -149,29091 | -17,82736 | -20,7 (6,4) | 22.1(8,9) | -26,4 (5,77) |  |
| TAHITI | T24 | -149,26239 | -17,85039 | -33,7 (1,2) | 6.6 (9,3) | -9,2 (6,7) | 9,1 (3) |
| TAHITI | T25 | -149,25874 | -17,8552 | -11,9 (10,2) | 19.9 (7,3) | 64.3 (45) | -1,1 |
| TAHITI | T26 | -149,25325 | -17,85716 | -20,7 (4,5) | 58.5 (4,15) |  | -0,8 |
| TAHITI | T27 | -149,25134 | -17,85828 | -17,1 (3,7) | 22.8 (9,9) |  | -4 |
| TAHITI | T28 | -149,20158 | -17,87771 | -27 (2,6) | 21,5 (5,35) | -15,3 (8,13) | -4 |
| TAHITI | T29 | -149,57839 | -17,7361 | -10,6 (10,4) | 23.6 (21,3) | -14,9 (7,39) |  |
| TAHITI | T30 | -149,61498 | -17,61018 | -11,1(6,5) | 34.6 (10,9) | 47.6 (9,3) |  |
| TAHITI | T31 | -149,61445 | -17,60306 | -8,8 (4,9) | 26.2 (13,6) | -18,2 (3,8) |  |
| TAHITI | T32  (Marina Taina) | -149,61488 | -17,58675 | 29.8 (14,9) |  |  | 19,5 (7,2) |
| TAHITI | T33 (Marina Taina) | -149,61647 | -17,58472 | -3,3 (11,4) | 55 (12,8) | -11,1 (9,7) | 16,8 (6,3) |
| TAHITI | T34 | -149,61685 | -17,57603 | -11,9 (5) | 56.1 (6,2) | -19,2 (10,1) |  |
| TAHITI | T35 | -149,61638 | -17,56939 | -5,7 (6,9) | 34.2 (2,3) | -18,6 (5,3) |  |
| TAHITI | T36 | -149,62842 | -17,56558 | -0,8 (7,5) | 74 |  | 46,4 (30,5) |
| **Island** | **Site** | **Longitude** | **Latitude** | ***S. Cucculata*** | ***T. Gracilaria*** | ***H. Fuscogilva*** | ***L. Stylirostris*** |
| TAHITI | T37 | -149,61505 | -17,55585 | -22 (5,3) | 15.3 (5,3) |  |  |
| TAHITI | T38 | -149,59253 | -17,5451 | -4,6 (3,3) | 18.6 (6,2) | -6,4 (15,2) |  |
| TAHITI | T39 | -149,30082 | -17,6052 | -11,6 (9,1) | 52.2 (4,8) | 19.1 (33,3) |  |
| TAHITI | T40 | -149,32224 | -17,56717 | -13,8 (51) | 49 (13,5) | 24.6 (32,7) |  |
| TAHITI | T41 | -149,32538 | -17,56327 | -16,5 (9,6) | 17.1 (7,6) |  |  |
| TAHITI | T42 | -149,41794 | -17,51313 | -10,9 (8,7) | 5.3 (8) |  |  |
| TAHITI | T43 (Hitimahana) | -149,48402 | -17,49944 | -12,3 (8,9) | 615 (21,5) | 98.3 (2,9) | 23,8 (28,5) |
| TAHITI | T44 | -149,49515 | -17,49522 | -4,3 (11,4) | 11.8 (5) | 20.8 (30,8) |  |
| TAHITI | T45 | -149,50051 | -17,50992 | -16,6 (8,6) | 9,5 (5,4) | 9.4 (35,4) |  |
| TAHITI | T46 | -149,50668 | -17,51574 | -13,2 (4,1) | 7,5 (5,2) |  |  |
| TAHITI | T47 | -149,5536 | -17,52383 | -12,2 (11,2) | 15 (9,6) |  |  |
| TAHITI | T48 | -149,56647 | -17,52826 | -2,7 (12,6) | 46.2 (6,9) | -17,2 (5,7) | 4 (5) |
| TAHITI | T49 | -149,56881 | -17,52802 | -3,3 (6) | 21.1 (1,7) | -17,3 (6,6) | 5,5 (17,8) |
| TAHITI | T50 | -149,57087 | -17,52995 | -7,7 (4,5) | 7 (5,7) | -13,5 (6,51) |  |
| TAHITI | T51 | -149,57814 | -17,53219 | -12,2(3,5) | 30.1 (11,9) |  |  |
| TAHITI | T52 | -149,57416 | -17,53325 | -26,9 (7,9) | 31.7 (2,9) |  | 18,3 (7,8) |
| TAHITI | T53 | -149,56949 | -17,53429 | -20 (6,3) | 79,7- (11,6) | 86.1 (24,1) | 5 (9,6) |
| TAHITI | T54 | -149,56935 | -17,53584 | 106,6 (9,02) | 78.4 (3,2) | 25.9 (45,6) | 11,3 (0,9) |
| TAHITI | T55 | -149,5691 | -17,53931 | -21,9 (5,7) | 32.6 (6,2) | -3,8 (9,8) | -2,3 |
| TAHITI | T56 | -149,57951 | -17,5363 | -18,4 (7) | 20.6 (3,9) |  |  |
| TAHITI | T57 | -149,57939 | -17,53326 | -19 (8,5) | 29.6 (4,9) |  |  |
| TAHITI | T58 | -149,58009 | -17,54301 | -29,1 (6,1) | 15.1 (6,9) | -7,3 (6,8) |  |
| TAHITI | T59 | -149,55069 | -17,52485 | -11,1 (6,7) | 1.7 (2,5) | -16,3 (536) |  |
| TAHITI | T60 | -149,53432 | -17,52477 | -8,5 (4,2) | 17.8 (6,8) | 4.6 (40,8) |  |
| TAHITI | T61 | -149,52777 | -17,52205 | 5,4 (10,1) | 21.2 (10,4) |  |  |
| TAHITI | T62 | -149,57969 | -17,73262 | -18,8 (4,2) | 17.7 (13,7) |  |  |
| TAHITI | T63 | -149,5858 | -17,6904 | -10,7 (6,2) | 5.8 (2,4) | 34.7 (60) |  |
| TAHITI | T64 | -149,59833 | -17,65976 | -7,6 (10,5) | 43.2 (20,6) | -14,6 (13) |  |
| TAHITI | T65 | -149,60977 | -17,64063 | -10,3 (6,7) | 61.5 (17,4) | 38.1 (47) |  |
| TAHITI | T66 | -149,61357 | -17,62858 | -18,2 (4,8) | 51.5 (22,5) |  |  |
| MOOREA | T67 | -149,75957 | -17,49843 | -16,8 (12) | 14.1 (5,3) |  |  |
| MOOREA | T68 | -149,7785 | -17,52047 | -23 (3,9) | 18.7 (5,4) | 17.8 (35) | -2,1 |
| MOOREA | T70 | -149,77725 | -17,5239 | -4,8 (1,8) | 35.6 (4,2) | 64.1 (55) | -0,4 |
| MOOREA | T71 | -149,78915 | -17,55093 | -3,6 (86) | 22,5 (8,3) | 0 |  |
| MOOREA | T72 | -149,80559 | -17,58685 | 5.7 (4,2) | 61.4 (11,2) |  | 33,5 (57) |
| MOOREA | T73 | -149,84337 | -17,58365 | 28.6 (2,1) | 61.8 (4,33) |  | 43,8 (49) |
| MOOREA | T74 (Haapiti) | -149,85385 | -17,58007 | 100 | 74.1 | 93.2 (8,7) | 63,1 (32,5) |
| MOOREA | T75 | -149,87091 | -17,56549 | -10,7 (2,5) | 29.7 (1,2) | 1 (20) |  |
| MOOREA | T76 | -149,9055 | -17,5354 | -4,5 (6) | 56.9 (1,5) | -11 (19,8) |  |
| MOOREA | T77 | -149,90907 | -17,48761 | -12,3 (14) | 55.5 (3,7) |  | 11,5(4,22) |
| MOOREA | T78 | -149,90376 | -17,48944 | 74 (2,9) | 80.8 (4,7) |  | 3,12 (3,13) |
| MOOREA | T79  (Opunohu) | -149,85075 | -17,51472 | 0,00 | 74.1 | 0 | 46,5 (7,4) |
| MOOREA | T80 | -149,84265 | -17,4822 | -5,4 (3,2) | 72.7 (2,4) | 0 | 8,4 (4,1) |
| MOOREA | T81 (Cook Bay) | -149,82164 | -17,50535 | -4,8 (9) | 40.9 (3,3) | 0 | 70,5 (24) |
| **Island** | **Site** | **Longitude** | **Latitude** | ***S. Cucculata*** | ***T. Gracilaria*** | ***H. Fuscogilva*** | ***L. Stylirostris*** |
| MOOREA | T82 | -149,8717 | -17,49185 | 3.7 (9,5) | 3.9 (2,2) |  |  |
| TAHITI | T83 | -149,51323 | -17,76221 | -27 (4) | 20 (8,2) |  |  |
| TAHITI | T84 | -149,50185 | -17,7641 | -12,3 (1,9) | 33- (4,14) | 0 |  |
| TAHITI | T85 (Vaitepiha) | -149,16582 | -17,75259 | -17,6 (9,02) | 27.1 (8,8) | 97 (5,5) | 52, (9,2) |
| TAHITI | T86 | -149,22856 | -17,73563 | -14,5 (4,7) | 18.2 (2,7) | 6.6 (5,8) | -1,3 |
| TAHITI | TF1 | -149,3035 | -17,69799 | 0 (1,6) | 12.6 (12,1) |  | 9,1 (4,9) |
| TAHITI | TF2 | -149,30515 | -17,71603 | 3 (3,9) | 20 (2,1) |  | 9,2 (15,3) |
| TAHITI | TF3 | -149,30258 | -17,21443 | -7,2 (3,6) | 24.4 (3,7) | -26,8 (4,5) | 1,6 (2,4) |
| TAHITI | TF4 | -149,30012 | -17,72457 | -15,4 (1,6) | 21.2 (1,5) | -23,5 (2,5) | 11,5 (5,7) |
| TAHITI | TF5 | -149,29722 | -17,72712 | -12,1 (9,4) | 10.2 (5,4) | -26 (6,4) | 3,3 (2) |
| TAHITI | TF6 | -149,28944 | -17,72863 | -15,8 (13,9) | 57.1 (1,3) |  | 3,2 (4,5) |
| TAHITI | TF7 | -149,29343 | -17,72329 | 1.3 (4) | 24 (9) |  | 24,2 (6,6) |
| TAHITI | TF8 | -149,3002 | -17,71567 | -8,6 (13,6) | 25.2 (3,9) | -2,9 (15,5) | -2,4 |
| TAHITI | TF9 | -149,2951 | -17,71523 | 0.7 (2,7) | 7.1 (8,8) | -0,7 (9) | 1,3 (1,8) |
| TAHITI | TF10 | -149,30583 | -17,71941 | -5,7 (6,4) | 11.4 (2,5) | -23,2 (5,3) | 1,4 (4,4) |
| HUAHINE | H1 | -151,00943 | -16,76745 | -10,6 (4,9) | 32.8 (10,8) |  |  |
| HUAHINE | H2 | -150,99069 | -16,73126 | 0,00 | 33.5 (9,8) |  | 34,2 (52) |
| HUAHINE | H3 | -150,98439 | -16,71449 | -13,1 (7,1) | 38,5 (5,86) | -9.9 (14,5) |  |
| HUAHINE | H4 | -150,95114 | -16,77184 | -15,5 (1,6) | 22.2 (14,2) | -5,7 (11,5) |  |
| HUAHINE | H5 | -150,96777 | -16,7947 | -22,5 (13,8) | 17.6 (4,8) | -8.7 (10,9) |  |
| HUAHINE | H6 | -150,98215 | -16,80973 | -15,7 (9) | 19.1 (11,01) |  |  |
| HUAHINE | H7 | -151,0096 | -16,78209 | -4,8 (3,1) | 17.2 (5,9) |  |  |
| HUAHINE | H8 | -151,039 | -16,78243 | -19,2 (11,8) | 11 (1,6) | -13,6 (6,51) |  |
| HUAHINE | H9 | -151,0334 | -16,73715 | -19 (11,3) | 17,5 (4,07) | 11.3 (5,22) |  |
| HUAHINE | H10 | -151,03897 | -16,71153 | -13,4 (2,5) | 52.7 (1,3) | -8,1 (17,36) | 10,1 (8,4) |
| HUAHINE | H11 | -151,03536 | -16,71436 | -15,2 (4,4) | 12.1(14,5) |  |  |
| HUAHINE | H12 | -151,03251 | -16,72147 | -18,9 (2) | 35,5 (4,9) |  |  |
| HUAHINE | H13 (lake Maeva) | -151,01396 | -16,69087 | -9,9 (2,7) | 28.6 (2,7) | 98.8 (20,1)2 | 97 (3) |
| BORA BORA | B1 | -151,75181 | -16,5015 | -22,8 (1,5) | 19.8 (2,9) | -4,3 (18,7) |  |
| BORA BORA | B2 | -151,75981 | -16,49295 | 0,00 | 19.2 (8,4) | -17,1 (12,3) |  |
| BORA BORA | B4 | -151,75231 | -16,50678 | -25,4 (6,8) | 55.3 (6,4) |  |  |
| BORA BORA | B5 | -151,74397 | -16,48734 | -5,5 (7,6) | 23.7 (5,9) |  |  |
| BORA BORA | B6 | -151,75592 | -16,47805 | -10,6 (12,4) | 310.9(5,1) | -21,8 (4,03) |  |
| BORA BORA | B7 | -151,7197 | -16,48724 | -14,9 (3,85) | 18.7 (6,7) | -25,4 (3,7) | 7,5 (4,3) |
| BORA BORA | B8 | -151,7213 | -16,50551 | -29,3 (5,7) | 74.1 | -19,9 (3,85) |  |
| BORA BORA | B9 | -151,73672 | -16,54229 | -17,1 (0,9) | 30.9 (11,4) |  |  |
| BORA BORA | B10 | -151,75848 | -16,48646 | -12,5 (2,6) | 39.4 (2,27) |  | 9,1 (14,5) |
| BORA BORA | B11 | -151,75448 | -16,44676 | -17,9 (4,6) | 14.3 (1,9) | -2,5 (28,4) | -0,8 |
| BORA BORA | B12 | -151,71637 | -16,46611 | -9,2 (7,3) | 35.6 (2,86) | 77- (27,7) |  |
| **Island** | **Site** | **Longitude** | **Latitude** | ***S. Cucculata*** | ***T. Gracilaria*** | ***H. Fuscogilva*** | ***L. Stylirostris*** |
| BORA BORA | B13 | -151,69885 | -16,48739 | -9 (7,8) | 32.3 (1,9) | -8,8 (10,3) |  |
| BORA BORA | B14 | -151,70238 | -16,49514 | -27,5 (7,5) | 32.1 (3,9) |  |  |
| BORA BORA | B15 | -151,70266 | -16,49888 | 20,6 (10,4) | 33.8 (13,2) |  |  |
| BORA BORA | B16 | -151,71661 | -16,48849 | -19,9 (0,5) | 12.3 (5,3) | 15.4 (13,4) | 2,9 (7,5) |
| BORA BORA | B17 | -151,77119 | -16,52702 | -22,7 (4) | 71.3 (1,9) | 91.2 (9,12) | 6,1 (3,9) |
| RAIATEA | R1 | -151,44252 | -16,72969 | -17,1 (1,8) | 27.1 (8,6) | -20,1 (2,86) |  |
| RAIATEA | R2 | -151,4505 | -16,72319 | -24 (4,4) | 22.3 (2,19) | -16,6 (13,28) |  |
| RAIATEA | R3 | -151,4476 | -16,7252 | -26,5 (1,8) | 16.2 (4,02) |  |  |
| RAIATEA | R4 | -151,44673 | -16,72496 | -10,7 (4,7) | 21.6 (1) |  |  |
| RAIATEA | R5 | -151,43911 | -16,73339 | -13,1 (5,34) | 10.9 (4,5) | -17,9 (3,2) |  |
| RAIATEA | R6 | -151,48489 | -16,7359 | -15,6 (5,6) | 27.3 (2,1) | -21,5 (2,88) | -2,9 |
| RAIATEA | R7 | -151,48419 | -16,73594 | -17 (10,5) | 5.2 (3,2) | 75.5 (1,2)5 |  |
| RAIATEA | R8 | -151,47771 | -16,72787 | -9 (10) | 22.4 (11) |  | -2,9 |
| RAIATEA | R9 | -151,47296 | -16,72425 | -14,9 (8,4) | 10.1 (5,1) |  |  |
| RAIATEA | R10 | -151,43665 | -16,74516 | -22,2 (12,4) | 37.4 (9,2) | -11,6 (12,5) |  |
| RAIATEA | R11 | -151,42398 | -16,77548 | -24,2 (17) | 20.9 (7,9) | -19,1 (6) |  |
| RAIATEA | R12 | -151,4173 | -16,81911 | 98.3 (3) | 33.8 (6,1) |  | 6,8 (3) |
| RAIATEA | R13 | -151,3732 | -16,83333 | 100 | 73,5 (7,2) |  | 15,1 (8,3) |
| RAIATEA | R14 | -151,43198 | -16,89549 | -19 (7,4) | 56.4 (0,4) | 75.7 (6,2) | 0,25 (3,9) |
| RAIATEA | R15 (Nao Nao) | -151,43156 | -16,91896 | -9,4 (5) | 57.6 (4,8) | -21,3 (2,55) |  |
| RAIATEA | R16 | -151,48123 | -16,84276 | -29,3 (6,3) | 26.2 (3,5) |  |  |
| RAIATEA | R17 | -151,49283 | -16,79219 | -25,7 (6,4) | 41.6 (1,8) |  |  |
| TAHA'A | T.1 | -151,48488 | -16,68372 | -15,3 (14,6) | 29.6 (15,4) | 23.9 (45,5) |  |
| TAHA'A | T.2 | -151,45911 | -16,67882 | -12,5 (5,4) | 4.9 (5,7) |  |  |
| TAHA'A | T.3 | -151,49101 | -16,6373 | -7,1 (12) | 19.2 (2,7) |  |  |
| TAHA'A | T.4 | -151,4586 | -16,62595 | -11 (9,2) | 2.8 (06) | 84 (9,9) |  |
| TAHA'A | T.5 | -151,46123 | -16,56937 | -10,7 (2,3) | 0.5 (4) | 88.4 (2,7) |  |
| TAHA'A | T.6 | -151,4974 | -16,58255 | 0.8 (5,9) | 13,5 (9,7) | -6,2 (4,2) |  |
| TAHA'A | T.7 | -151,53172 | -16,58791 | -0,5 (4,5) | 14.9 (7,1) |  |  |
| TAHA'A | T.8 | -151,54642 | -16,61866 | -19,5 (3,9) | 8.4 (9,8) |  |  |
| TAHA'A | T.9 | -151,51335 | -16,64212 | -20,3 (8,9) | 0.2 (3,6) | 24.6 (9,3) |  |
